# Supplementary material
Source: Springer Nature journal article supplement (https://www.springermedizin.de/resource/supplementary/12888_2012_1242_MOESM2_ESM.pdf/9480748)
Supplement: MOESM2 [file 9480748]

**Multi-centre study:  
Germany,  
Italy,  
Spain,  
Switzerland,  
Israel and  
UK**

**RQ 1:**  
Pre-test  
N = 18

**RQ 2:**  
Pilot-study  
N = 300

**RQ 3:**  
Cross-sectional  
study  
N = 3000

**RQ 4:**  
Longitudinal  
study  
N = 2550

**age-stratified, random  
community sample**

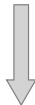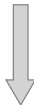

**Total duration: 4 Years**
